# Supplementary material for: A theoretical exploration of the structural feature, mechanical, and optoelectronic properties of Au-based halide perovskites A2AuIAuIIIX6 (A = Rb, Cs; X = Cl, Br, I)
Source: Royal Society of Chemistry journal article supplement (doi:10.1039/d3cp04269c), 2023-01-01
Supplement: d3cp04269c1.pdf [file d3cp04269c1.pdf]

## Electronic supplementary information

### A theoretical exploration of structural feature, mechanical, and optoelectronic properties of Au-based halide perovskites $A_2Au^IAu^{III}X_6$ (A = Rb, Cs; X = Cl, Br, I)

Diwen Liu,<sup>a\*</sup> Huihui Zeng,<sup>a</sup> Huan Peng,<sup>a</sup> and Rongjian Sa<sup>b\*</sup>

<sup>a</sup>School of Materials and Chemical Engineering, Pingxiang University, Pingxiang, 337055, China

Email: [liudiwen1987@163.com](mailto:liudiwen1987@163.com)

<sup>b</sup>College of Materials and Chemical Engineering, Minjiang University, Fuzhou, 350108, China Email:

[rjsa@mju.edu.cn](mailto:rjsa@mju.edu.cn)

#### Computational details

The power conversion efficiency  $\eta$  of an absorber layer can be defined as  $\eta = P_m/P_{in}$ , where  $P_m$  is the maximum output power density and  $P_{in}$  is the total incident solar power density. The  $P_m$  can be derived by numerically maximizing  $J$  (the current density)  $\times V$  (voltage). The  $J$  for a solar cell illuminated under the photon flux  $I_{sun}$  is given by the equation  $J = J_{sc} - J_0(1 - e^{V/kT})$  ( $k$  is the Boltzmann's constant and  $T$  is the temperature). The short-circuit current density  $J_{sc}$  is defined as  $J_{sc} = e \int_0^\infty A(E)I_{sun}(E)dE$ , where  $e$ ,  $A(E)$ , and  $I_{sun}(E)$  are the elementary charge, the photon absorptivity, and the standard AM1.5G solar spectrum at 300 K, respectively. The reverse saturation current  $J_0$  ( $J_0 = J_0^{nr} + J_0^r = J_0^r / f_r$ ) corresponds to the total electron-hole recombination current density at equilibrium in the dark. The fraction of radiative recombination current  $f_r$  is

computed by the expression  $f_r = \exp\left(\frac{E_g - E_g^{da}}{kT}\right)$ , where  $E_g$  and  $E_g^{da}$  are the fundamental and direct allowed band gaps, respectively. The  $J_0^r$  is calculated from the rate black-body photon absorption from the surrounding thermal bath through the front surface  $J_0^r = e\pi \int_0^\infty A(E)I_{bb}(E, T)dE$ , where  $I_{bb}(E, T)$  is the black-body spectrum at room temperature. The  $A(E)$  can be obtained from the relation  $A(E) = 1 - e^{-2\alpha(E)L}$ , where  $L$  and  $\alpha(E)$  are the film thickness and the absorption spectrum of the material, respectively. In addition, the open-circuit voltage  $V_{OC}$  is determined by the relationship  $V_{OC} = \frac{kT}{e} \ln\left(1 + \frac{J_{SC}}{J_0}\right)$ . Finally, the maximum  $\eta$  of a material can be evaluated once two parameters  $\alpha(E)$  and  $f_r$  are obtained.
